# Supplementary material
Source: publisher figshare collection journal article supplement (https://gsajournals.figshare.com/ndownloader/files/18714659)
Supplement: Supplementary file 1 [file 18714659]

## Sheet: Sheet1
Table S1. Detailed summary of RNA-Sequencing results.
Samples	Raw reads	Clean reads	Total reads	Clean bases	Total mapped	Multiple mapped	Uniquely mapped	Reads map to '+'	Reads map to '-'	Q20(%)	Q30(%)	GC %	Notes
ck_1	63907692	62954420	62954420	9.44G	56800472 (90.22%)	2076354 (3.3%)	54724118 (86.93%)	27336293 (43.42%)	27387825 (43.5%)	98.14	94.2	42.58	replicate 1
ck_2	59612900	58987528	58987528	8.85G	52618695 (89.2%)	1843897 (3.13%)	50774798 (86.08%)	25347847 (42.97%)	25426951 (43.11%)	97.15	92.15	42.36	replicate 2
ck_3	59891922	59160746	59160746	8.87G	52854685 (89.34%)	1817131 (3.07%)	51037554 (86.27%)	25498000 (43.1%)	25539554 (43.17%)	97.37	92.65	42.3	replicate 3
90128_24_1	53162668	52465884	52465884	7.87G	44936121 (85.65%)	2291702 (4.37%)	42644419 (81.28%)	21272233 (40.54%)	21372186 (40.74%)	97.55	93.03	41.75	replicate 1
90128_24_2	58749064	57092568	57092568	8.56G	49270027 (86.3%)	2110217 (3.7%)	47159810 (82.6%)	23533435 (41.22%)	23626375 (41.38%)	97.27	92.36	41.25	replicate 2
90128_24_3	54687216	53403434	53403434	8.01G	46230121 (86.57%)	1838032 (3.44%)	44392089 (83.13%)	22180857 (41.53%)	22211232 (41.59%)	97.24	92.26	41.25	replicate 3
90128_72_1	42987040	42442160	42442160	6.37G	37115818 (87.45%)	1922609 (4.53%)	35193209 (82.92%)	17555527 (41.36%)	17637682 (41.56%)	97.59	93.03	42.31	replicate 1
90128_72_2	47864298	47050222	47050222	7.06G	41590631 (88.4%)	1525339 (3.24%)	40065292 (85.15%)	20012612 (42.53%)	20052680 (42.62%)	97.16	92.09	42.48	replicate 2
90128_72_3	51440666	50783440	50783440	7.62G	44663116 (87.95%)	1619359 (3.19%)	43043757 (84.76%)	21501076 (42.34%)	21542681 (42.42%)	97.67	93.23	42.58	replicate 3
CN152_24_1	51628218	50645970	50645970	7.60G	44366302 (87.6%)	1967229 (3.88%)	42399073 (83.72%)	21167390 (41.79%)	21231683 (41.92%)	97.43	92.66	42.02	replicate 1
CN152_24_2	52733816	51609526	51609526	7.74G	46095042 (89.31%)	1776109 (3.44%)	44318933 (85.87%)	22130010 (42.88%)	22188923 (42.99%)	98.46	95.2	42.3	replicate 2
CN152_24_3	54542236	53851118	53851118	8.08G	46975999 (87.23%)	2005712 (3.72%)	44970287 (83.51%)	22441383 (41.67%)	22528904 (41.84%)	95.69	89.02	42.3	replicate 3
CN152_72_1	50939892	50291180	50291180	7.54G	44139980 (87.77%)	1590683 (3.16%)	42549297 (84.61%)	21261274 (42.28%)	21288023 (42.33%)	97.32	92.43	42.39	replicate 1
CN152_72_2	51514318	50912860	50912860	7.64G	45624288 (89.61%)	1711747 (3.36%)	43912541 (86.25%)	21954556 (43.12%)	21957985 (43.13%)	97.58	93.02	42.37	replicate 2
CN152_72_3	60351818	59384556	59384556	8.91G	48985802 (82.49%)	2076377 (3.5%)	46909425 (78.99%)	23430090 (39.45%)	23479335 (39.54%)	97.64	93.22	42.5	replicate 3
